# Supplementary material for: Potential Utility of Pre-Emptive Germline Pharmacogenetics in Breast Cancer
Source: MDPI journal article supplement (doi:10.3390/cancers13061219), 2021-03-11
Supplement: s1 [file s1]

A

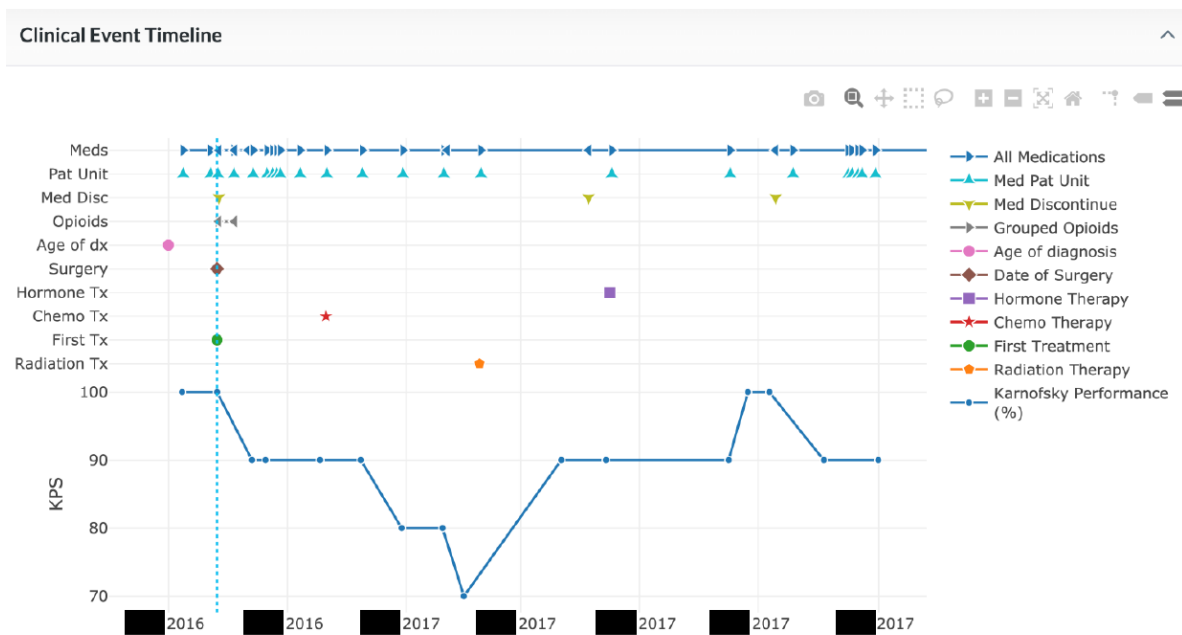

B

**Pharmacogenomics**

23 Results

| Gene    | Interpretation                                          |
|---------|---------------------------------------------------------|
| ABCB1   | *1/*2 Normal response expected                          |
| APOE    | NEG/NEG Not Available APOE gene n                       |
| COMT    | HET Increase dose                                       |
| CYP1A2  | *1F/*1F Ultrarapid metabolizer                          |
| CYP2B6  | NEG/NEG Normal metabolizer CYP2B6 gene product metaboli |
| CYP2C19 | *17/NEG Extensive metabolizer                           |
| CYP2C8  | NEG/NEG Normal metabolizer                              |
| CYP2C9  | NEG/NEG Normal metabolizer                              |
| CYP2D6  | *4/*5 Poor metabolizer                                  |

C

**Medications**

51 Results

| Medication                                      | Time |
|-------------------------------------------------|------|
| Omeprazole Cap Delayed Release 40 MG            |      |
| Bisoprolol & Hydrochlorothiazide Tab 10-6.25 MG |      |
| URINARY ANTISPASMODICS                          |      |
| Fluoxetine HCl Cap 20 MG                        |      |
| Simvastatin Tab 20 MG                           |      |
| Trazodone HCl Tab 50 MG                         |      |
| Estradiol Tab 0.5 MG                            |      |
| Medroxyprogesterone Acetate Tab 2.5 MG          |      |
| Multiple Vitamins w/ Minerals Tab               |      |
| Multiple Vitamins w/ Minerals Cap               |      |

**Figure S1.** PHC screenshot of clinical timeline view and data tables for representative breast cancer patient referenced in Case Study 1.
